# Supplementary material for: Purity Assessment of Tripropyl Phosphate through Mass Balance and 1H and 31P Quantitative Nuclear Magnetic Resonance
Source: MDPI journal article supplement (doi:10.3390/molecules29091975), 2024-04-25
Supplement: s1 [file s1]

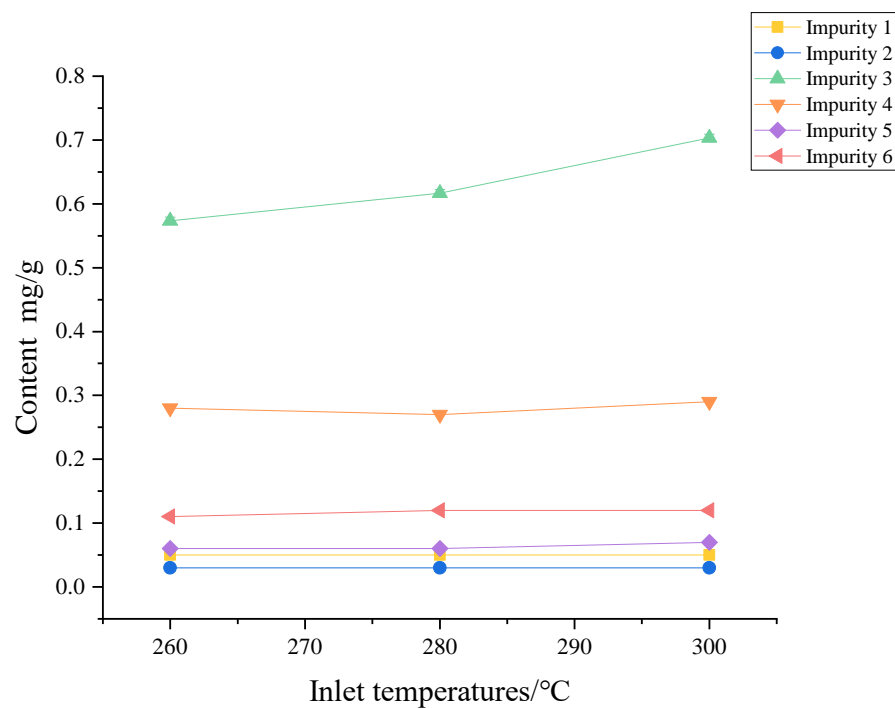

**Figure S1.** Content of impurities detected at different inlet temperatures

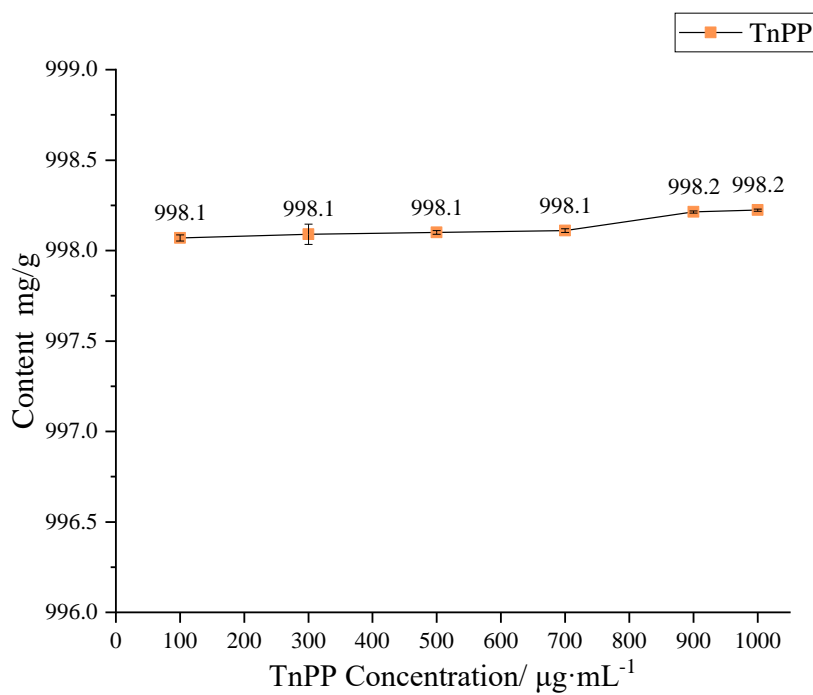

**Figure S2.** Purity of TnPP determined at different concentrations

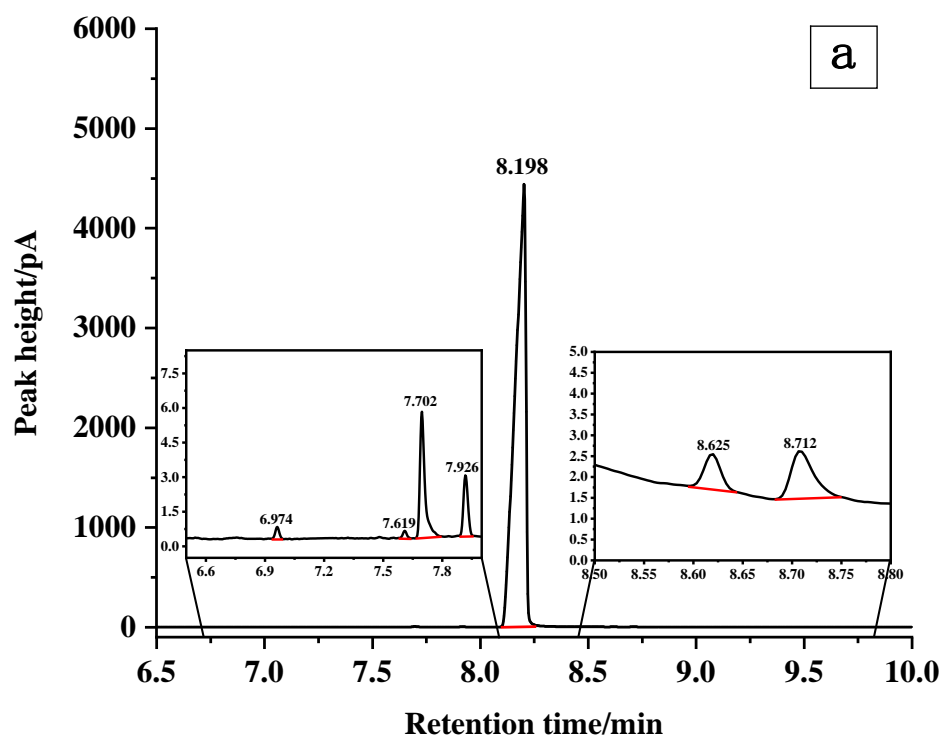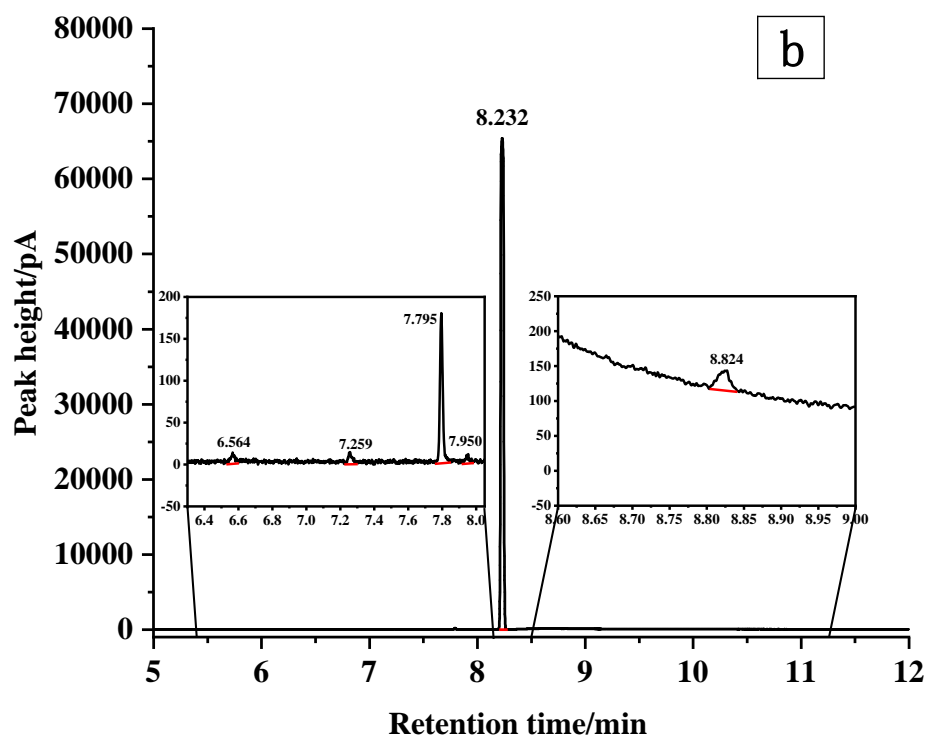

**Figure S3.** Gas chromatogram of TnPP using different detector (a) Gas chromatogram of TnPP by FID; (b) Gas chromatogram of TnPP by FPD

**Table S1.** Comparison of major component and impurities content at different inlet temperatures

| Compounds  | 260 °C <sup>1</sup> (mg/g) | 280 °C <sup>2</sup> (mg/g) | 300 °C <sup>3</sup> (mg/g) |
|------------|----------------------------|----------------------------|----------------------------|
| Impurity 1 | 0.05                       | 0.05                       | 0.05                       |
| Impurity 2 | 0.03                       | 0.03                       | 0.03                       |
| Impurity 3 | 0.57                       | 0.62                       | 0.70                       |
| Impurity 4 | 0.28                       | 0.27                       | 0.29                       |
| Impurity 5 | 0.06                       | 0.06                       | 0.07                       |
| Impurity 6 | 0.11                       | 0.12                       | 0.12                       |
| TnPP       | 998.83                     | 998.78                     | 998.66                     |

<sup>1</sup> Inlet temperature is 260 °C<sup>2</sup> Inlet temperature is 280 °C<sup>3</sup> Inlet temperature is 300 °C**Table S2.** Inorganic impurities content in TnPP

| Element                     | Atomic weight | Content (ng/ml) | Element | Atomic weight | Content (ng/ml) |
|-----------------------------|---------------|-----------------|---------|---------------|-----------------|
| B                           | 11            | 24.57           | Ni      | 60            | 0.12            |
| Na                          | 23            | 92.98           | Cu      | 63            | 0.32            |
| Mg                          | 24            | 605.16          | Zn      | 66            | 17.54           |
| Al                          | 27            | 17.73           | As      | 75            | 0.31            |
| K                           | 39            | 2.07            | Sr      | 88            | 0.34            |
| Sc                          | 45            | 1.97            | Sn      | 118           | 0.11            |
| Ti                          | 47            | 97.48           | I       | 127           | 3.94            |
| V                           | 51            | 0.26            | Ba      | 137           | 1.54            |
| Cr                          | 52            | 2.21            | Tb      | 159           | 0.01            |
| Mn                          | 55            | 0.08            | W       | 182           | 0.02            |
| Fe                          | 56            | 1.01            | U       | 238           | 0.01            |
| Total concentration (ng/ml) |               |                 | 869.78  |               |                 |
| TnPP (ng/ml)                |               |                 | 1000000 |               |                 |
| Inorganic impurity (mg/g)   |               |                 | 0.870   |               |                 |

**Table S3.** Purity results of TnPP by MB method

| Number | Content (mg/g) | X <sub>w</sub> <sup>1</sup> (mg/g) | X <sub>v</sub> <sup>2</sup> (mg/g) | X <sub>NV</sub> <sup>3</sup> (mg/g) | Content (mg/g) | Average value (mg/g) | SD <sup>4</sup> (mg/g) | RSD <sup>5</sup> (%) |
|--------|----------------|------------------------------------|------------------------------------|-------------------------------------|----------------|----------------------|------------------------|----------------------|
| 1      | 998.63         |                                    |                                    |                                     | 994.60         |                      |                        |                      |
| 2      | 998.63         |                                    |                                    |                                     | 994.60         |                      |                        |                      |
| 3      | 998.64         |                                    |                                    |                                     | 994.61         |                      |                        |                      |
| 4      | 998.63         |                                    |                                    |                                     | 994.60         |                      |                        |                      |
| 5      | 998.62         |                                    |                                    |                                     | 994.59         |                      |                        |                      |
| 6      | 998.63         | 3.16                               | 0.00                               | 0.87                                | 994.60         | 994.60               | 0.0081                 | 0.0008               |
| 7      | 998.62         |                                    |                                    |                                     | 994.59         |                      |                        |                      |
| 8      | 998.61         |                                    |                                    |                                     | 994.58         |                      |                        |                      |
| 9      | 998.63         |                                    |                                    |                                     | 994.60         |                      |                        |                      |
| 10     | 998.63         |                                    |                                    |                                     | 994.60         |                      |                        |                      |
| 11     | 998.62         |                                    |                                    |                                     | 994.59         |                      |                        |                      |

<sup>1</sup> Water content<sup>2</sup> Volatile solvent content<sup>3</sup> Inorganic impurity content<sup>4</sup> Standard deviation<sup>5</sup> Relative standard deviation

**Table S4.** Purity results of TnPP by qNMR

| Number           | Content of the $^1\text{H}$ -qNMR<br>(mg/g) | Content of the $^{31}\text{P}$ -qNMR<br>(mg/g) |
|------------------|---------------------------------------------|------------------------------------------------|
| 1                | 994.7                                       | 992.6                                          |
| 2                | 992.6                                       | 993.7                                          |
| 3                | 993.6                                       | 994.6                                          |
| 4                | 995.7                                       | 994.3                                          |
| 5                | 994.8                                       | 992.0                                          |
| 6                | 992.7                                       | 994.5                                          |
| 7                | 994.4                                       | 992.7                                          |
| Average value    | 994.1                                       | 993.5                                          |
| RSD <sup>1</sup> | 0.12%                                       | 0.11%                                          |

<sup>1</sup> Relative standard deviation
